# Supplementary material for: Model‐Based Population Pharmacokinetic Analysis of Nivolumab in Patients With Solid Tumors
Source: PubMed Central journal article supplement — CPT Pharmacometrics Syst Pharmacol. 2016 Dec 26;6(1):58–66. doi: 10.1002/psp4.12143 (PMC5270302; doi:10.1002/psp4.12143), 2016-12-26
Supplement: PSP4-6-58-s002.pdf [file PSP4-6-58-s002.pdf]

**Supplemental Figure S1.** Final model. Conditional weighted residuals with interaction (CWRESI) versus actual time after first dose.

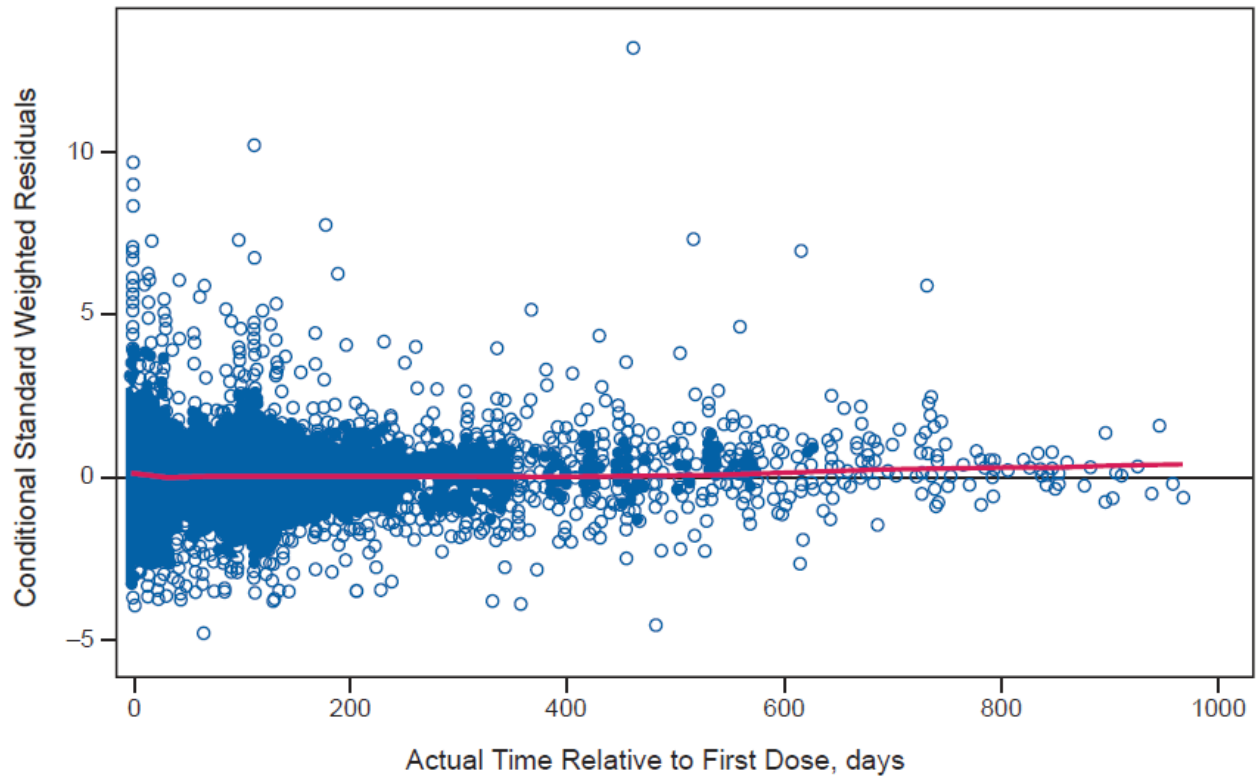

The red line represents a locally weighted smooth line.
