# Supplementary material for: Model‐Based Population Pharmacokinetic Analysis of Nivolumab in Patients With Solid Tumors
Source: PubMed Central journal article supplement — CPT Pharmacometrics Syst Pharmacol. 2016 Dec 26;6(1):58–66. doi: 10.1002/psp4.12143 (PMC5270302; doi:10.1002/psp4.12143), 2016-12-26
Supplement: PSP4-6-58-s003.pdf [file PSP4-6-58-s003.pdf]

**Supplemental Figure S2.** Conditional weighted residuals with interaction (CWRESI) versus predicted (typical) serum concentration.

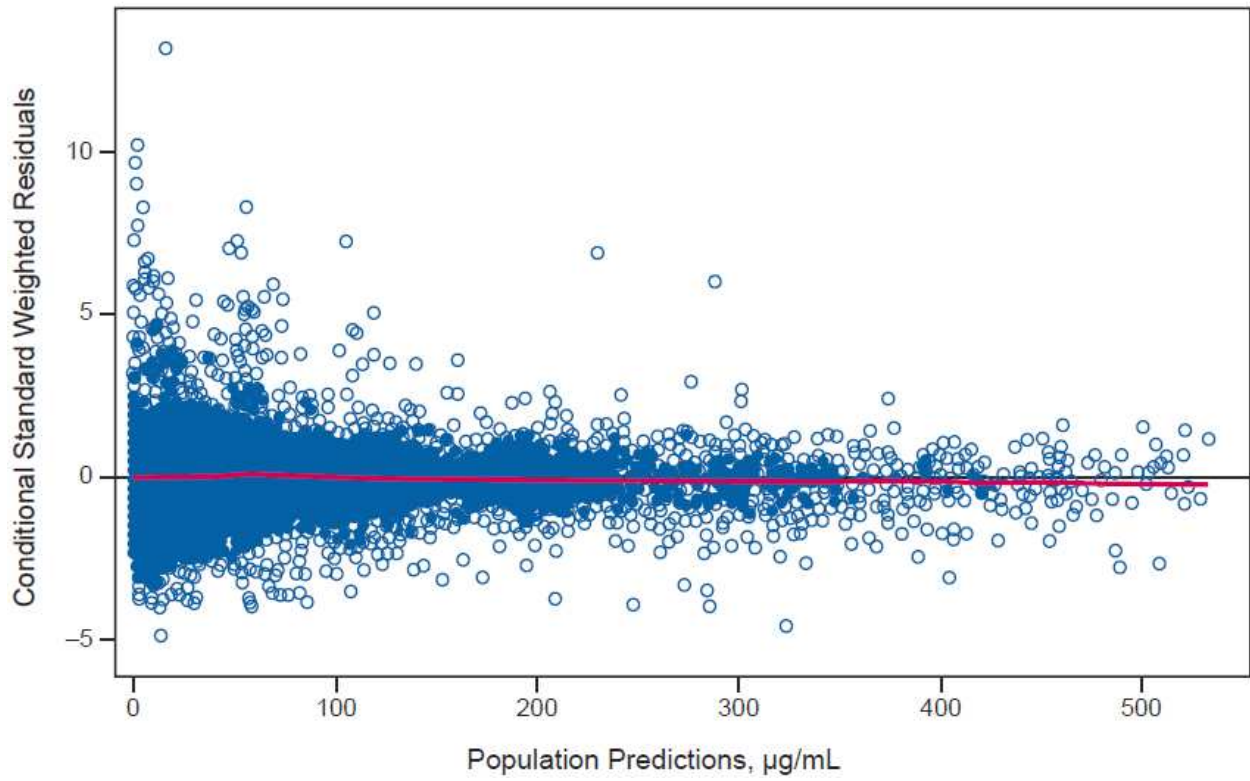

The red line represents a locally weighted smooth line.
