# Supplementary material for: Model‐Based Population Pharmacokinetic Analysis of Nivolumab in Patients With Solid Tumors
Source: PubMed Central journal article supplement — CPT Pharmacometrics Syst Pharmacol. 2016 Dec 26;6(1):58–66. doi: 10.1002/psp4.12143 (PMC5270302; doi:10.1002/psp4.12143), 2016-12-26
Supplement: PSP4-6-58-s004.pdf [file PSP4-6-58-s004.pdf]

**Supplemental Figure S3.** Observed versus predicted population average and individual concentrations.

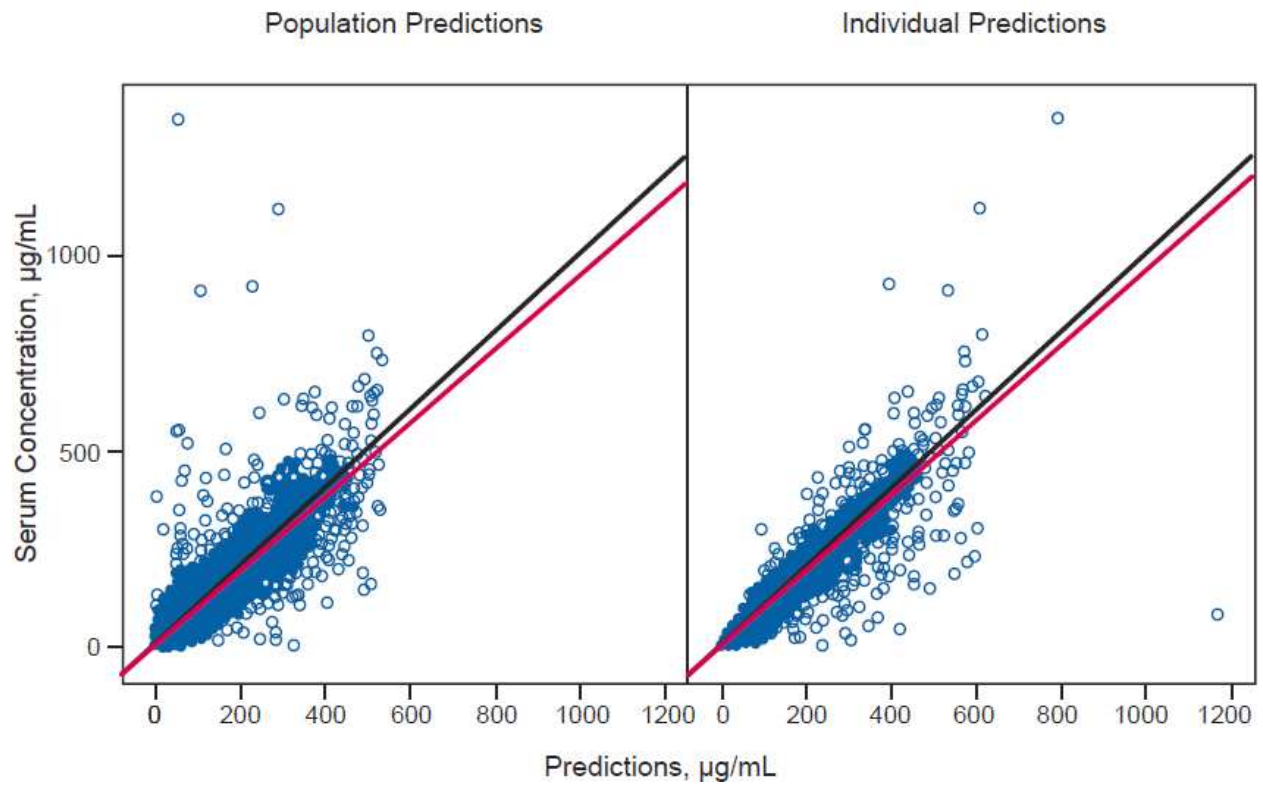

The solid black line represents the line of identity; the solid red line represents locally weighted smooth line.
