# Supplementary material for: Model‐Based Population Pharmacokinetic Analysis of Nivolumab in Patients With Solid Tumors
Source: PubMed Central journal article supplement — CPT Pharmacometrics Syst Pharmacol. 2016 Dec 26;6(1):58–66. doi: 10.1002/psp4.12143 (PMC5270302; doi:10.1002/psp4.12143), 2016-12-26
Supplement: PSP4-6-58-s006.pdf [file PSP4-6-58-s006.pdf]

**Supplemental Figure S5.** Box plots showing the lack of relationship between renal function status and nivolumab clearance.

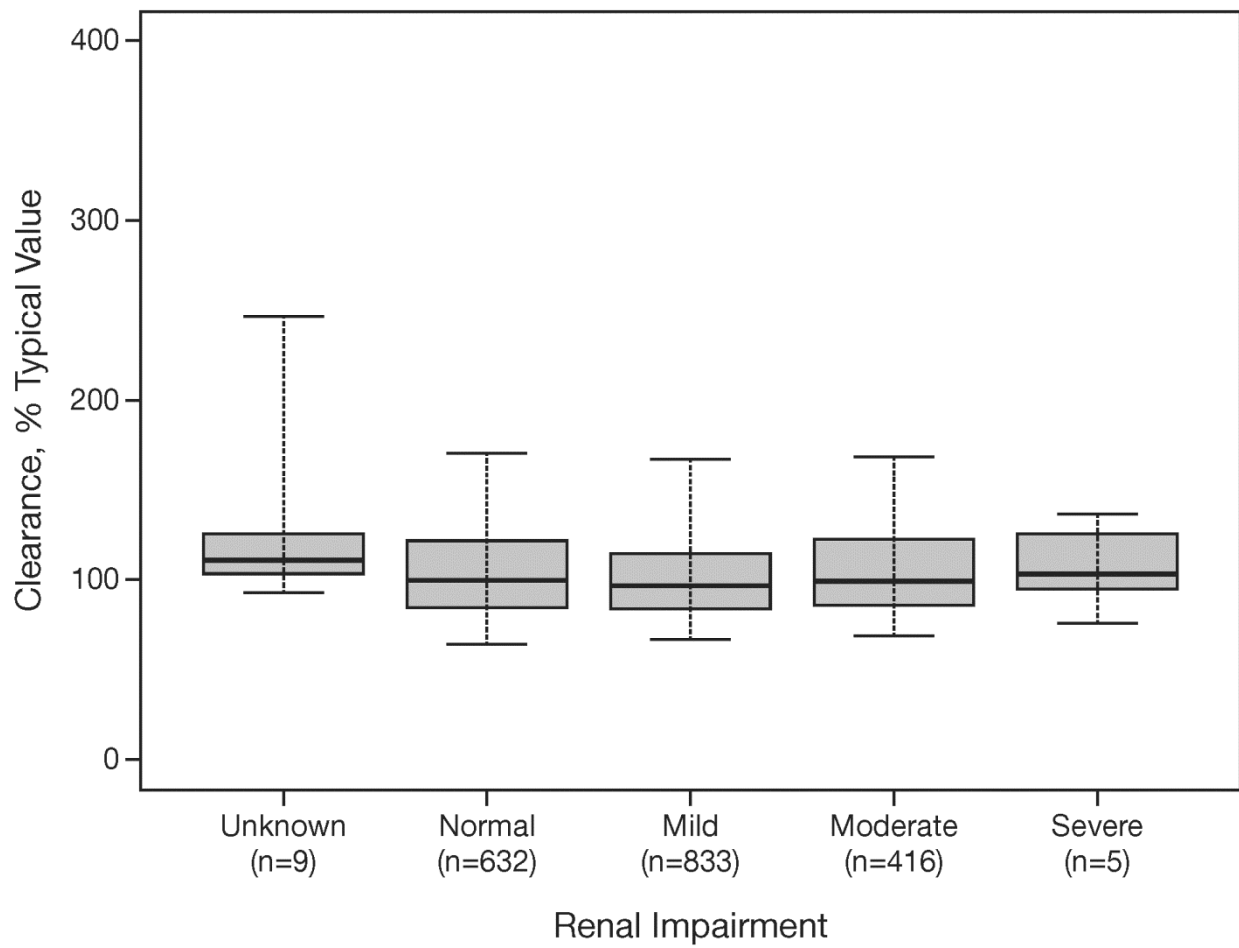

The box plots represent median (bold line), 25th, and 75th percentiles of the distribution. The whiskers represent 5th and 95th percentiles of the distribution.
