# Supplementary material for: Model‐Based Population Pharmacokinetic Analysis of Nivolumab in Patients With Solid Tumors
Source: PubMed Central journal article supplement — CPT Pharmacometrics Syst Pharmacol. 2016 Dec 26;6(1):58–66. doi: 10.1002/psp4.12143 (PMC5270302; doi:10.1002/psp4.12143), 2016-12-26
Supplement: PSP4-6-58-s007.pdf [file PSP4-6-58-s007.pdf]

**Supplemental Figure S6.** Box plots showing the apparent lack of relationship between hepatic function status and nivolumab clearance.

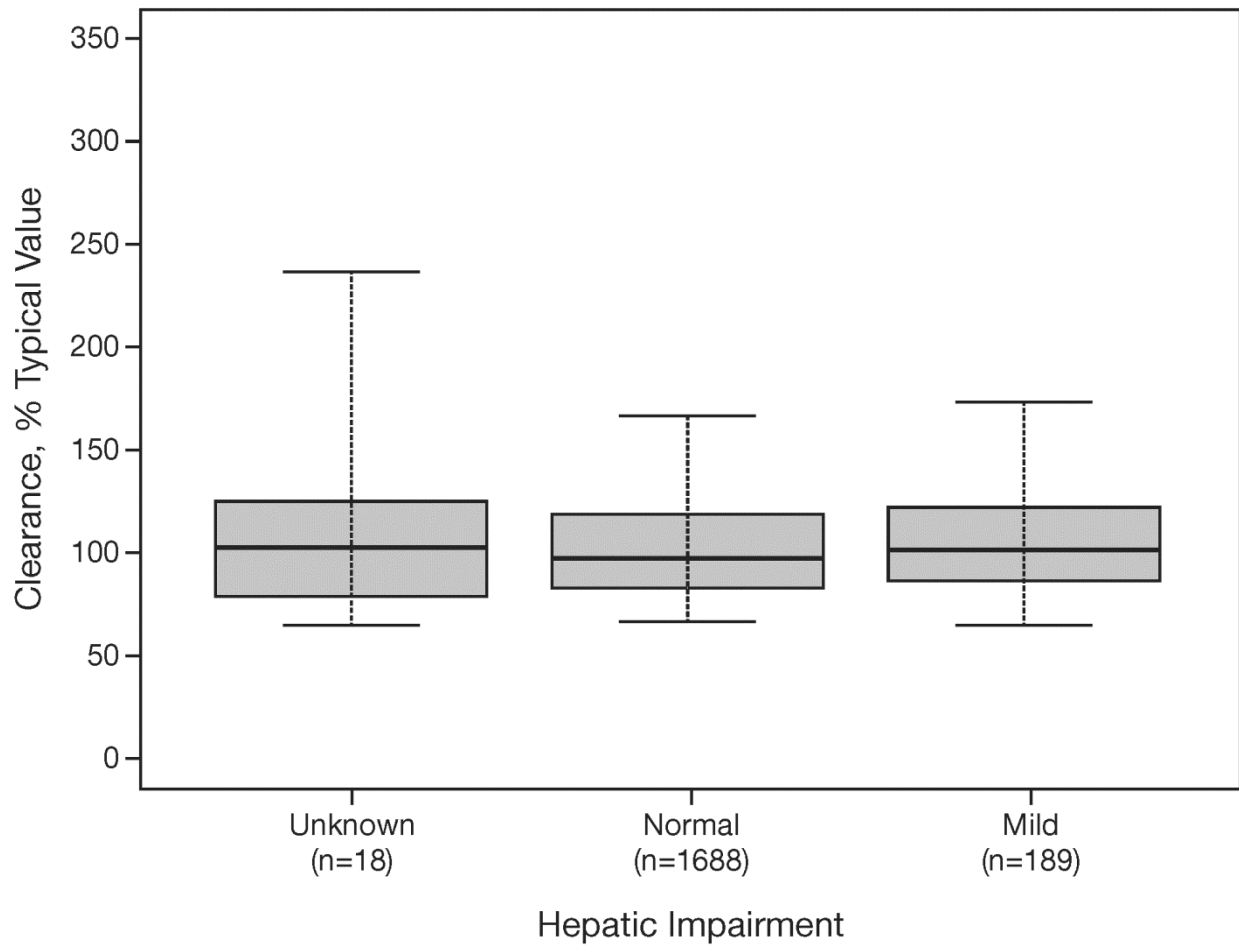

The box plots represent median (bold line), 25th, and 75th percentiles of the distribution. The whiskers represent 5th and 95th percentiles of the distribution. Criteria from the National Cancer Institute Organ Dysfunction Working Group were used to classify patients into different hepatic function categories.
