# Supplementary material for: Model‐Based Population Pharmacokinetic Analysis of Nivolumab in Patients With Solid Tumors
Source: PubMed Central journal article supplement — CPT Pharmacometrics Syst Pharmacol. 2016 Dec 26;6(1):58–66. doi: 10.1002/psp4.12143 (PMC5270302; doi:10.1002/psp4.12143), 2016-12-26

**Supplemental Figure S8.** Distributions of nivolumab clearance estimates between occasions of positive and negative anti-drug antibodies (ADAs) within patients

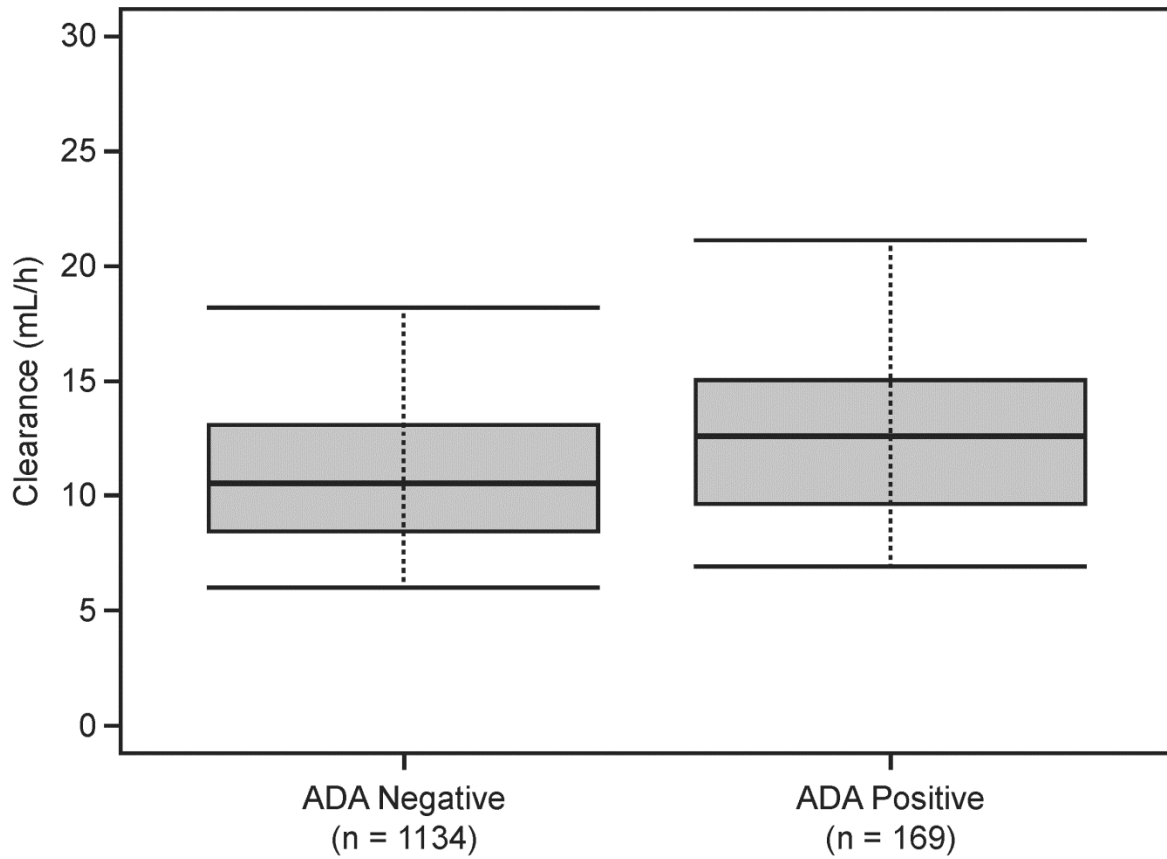

Supplement: PSP4-6-58-s009.pdf [file PSP4-6-58-s009.pdf]
